# Supplementary material for: Efficacy and safety of colchicine in COVID-19: a meta-analysis of randomised controlled trials
Source: HighWire-hosted journal article supplement (doi:10.1136/rmdopen-2021-001746), 2021-10-01

Figure S1A. Funnel plot for assessing publication bias of the included studies for mortality outcome in colchicine group vs supportive care in COVID-19

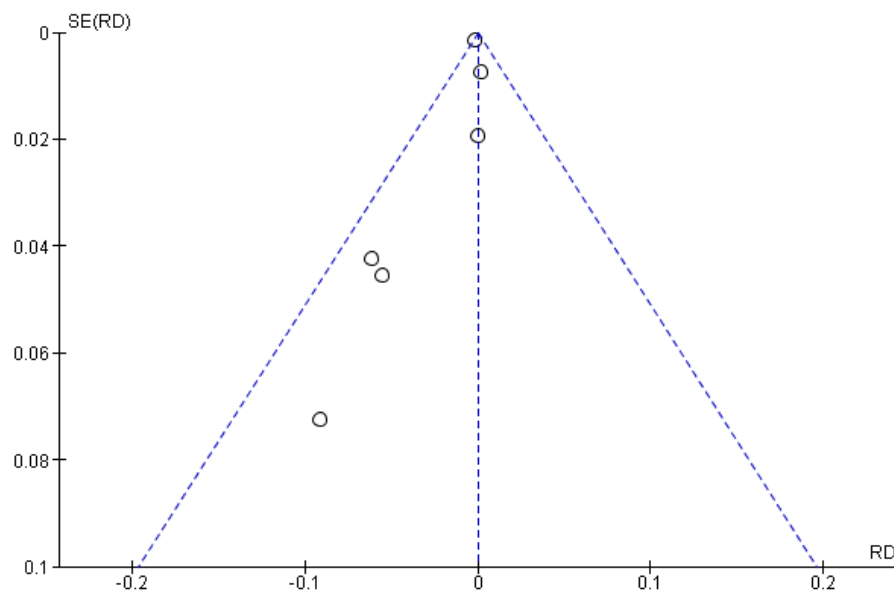

Figure S1B. Funnel plot for assessing publication bias of the included studies for ventilatory support outcome in colchicine group vs supportive care in COVID-19

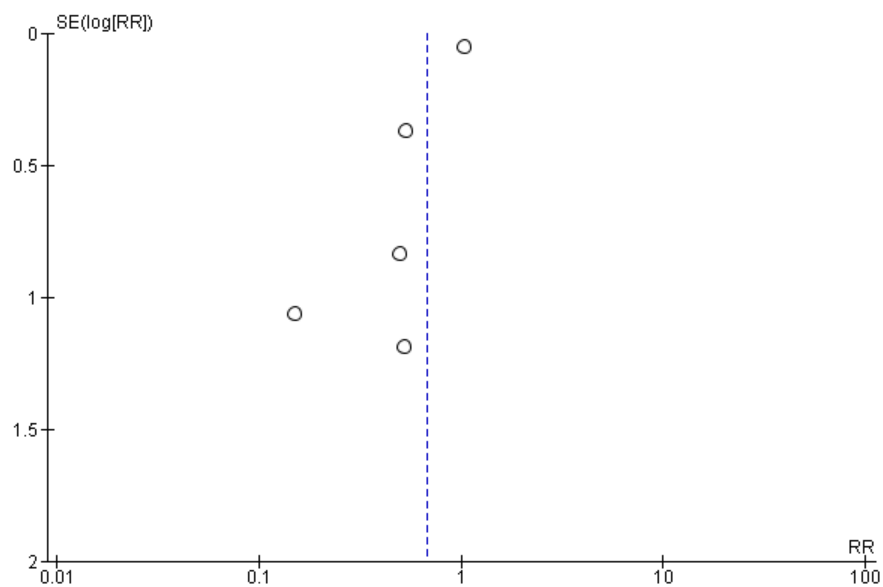

Figure S1C. Funnel plot for assessing publication bias of the included studies for ICU admission outcome in colchicine group vs supportive care in COVID-19

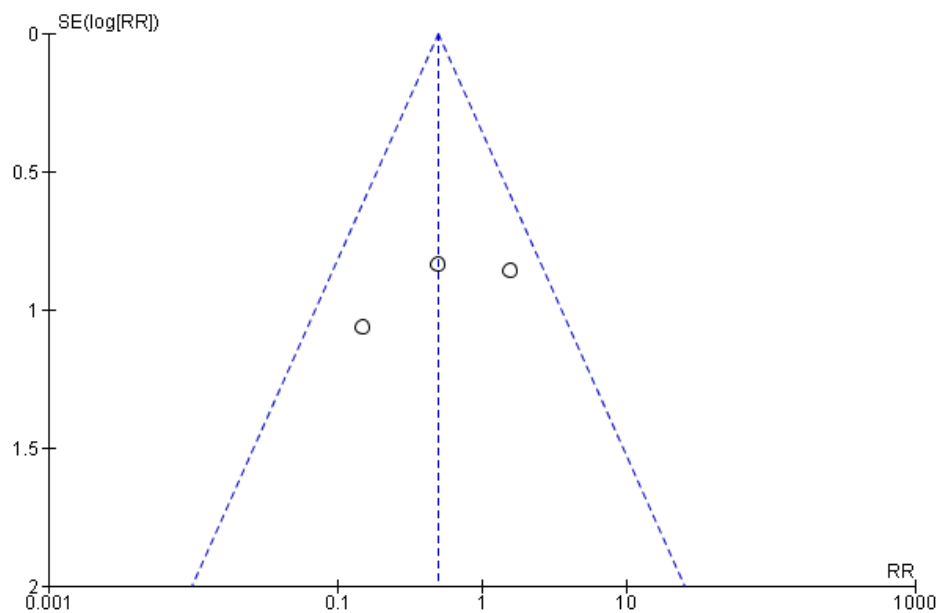

Figure S1D. Funnel plot for assessing publication bias of the included studies for length of hospital stay outcome in colchicine group vs supportive care in COVID-19

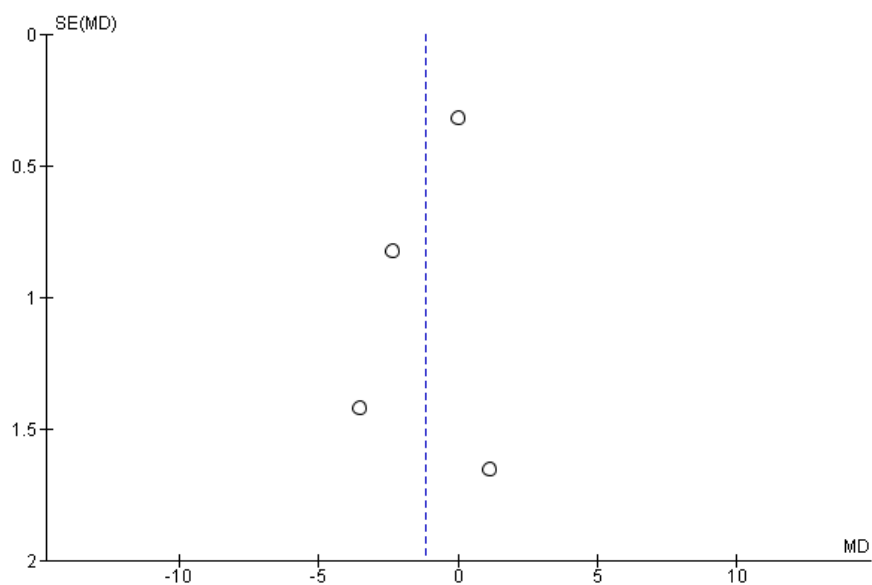

Supplement: rmdopen-2021-001746supp001_data_supplement.pdf [file rmdopen-2021-001746supp001_data_supplement.pdf]
