# Supplementary material for: Efficacy and safety of colchicine in COVID-19: a meta-analysis of randomised controlled trials
Source: HighWire-hosted journal article supplement (doi:10.1136/rmdopen-2021-001746), 2021-10-01

Supplementary Figure S2. Meta-analytic summary of efficacy outcomes after sensitivity analysis based on risk of bias assessment

S2A. Mortality

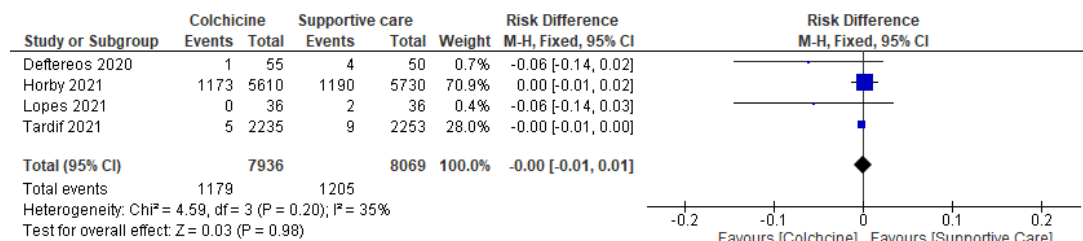

S2B. Ventilatory Support

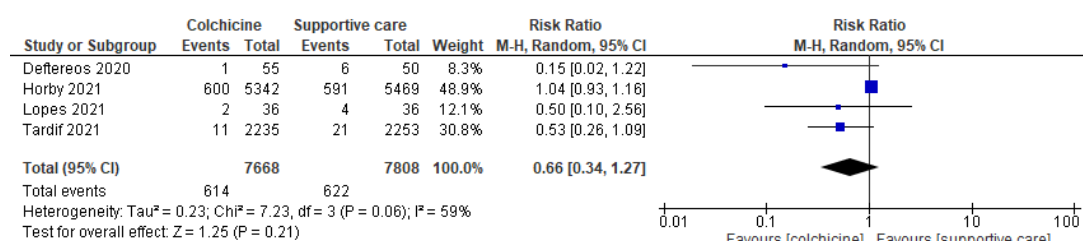

S3C. ICU Admission

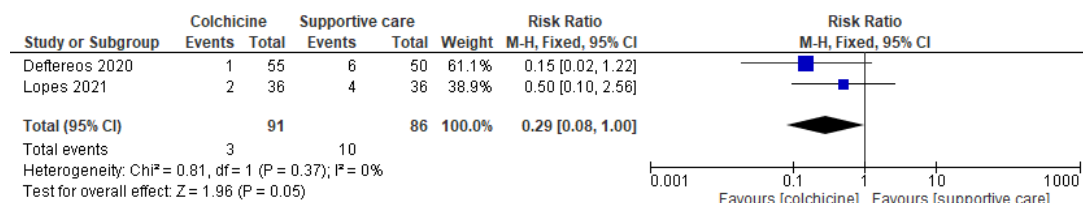

S3D. Length of hospital stay

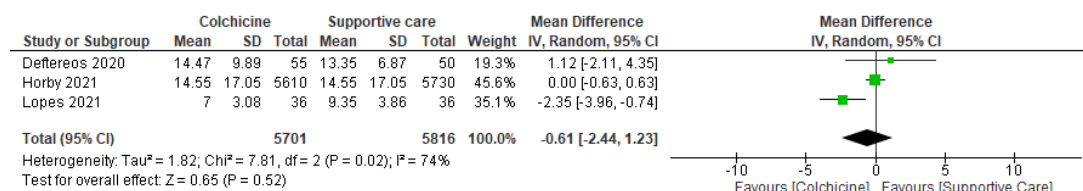

Supplement: rmdopen-2021-001746supp002_data_supplement.pdf [file rmdopen-2021-001746supp002_data_supplement.pdf]
