# Supplementary material for: Efficacy and safety of colchicine in COVID-19: a meta-analysis of randomised controlled trials
Source: HighWire-hosted journal article supplement (doi:10.1136/rmdopen-2021-001746), 2021-10-01

### Supplementary Figure S3. Meta-analytic summary of efficacy and safety outcomes after sensitivity analysis based on the follow-up duration of studies

#### S3A. Mortality

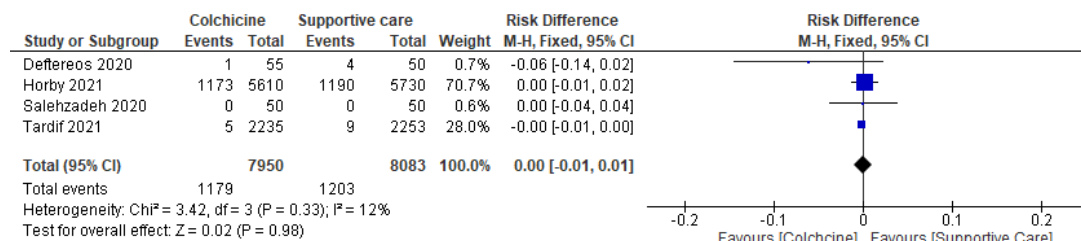

#### S3B. Ventilatory Support

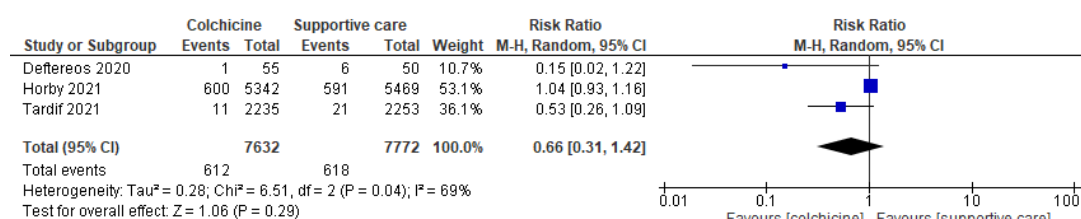

#### S3C. ICU Admission

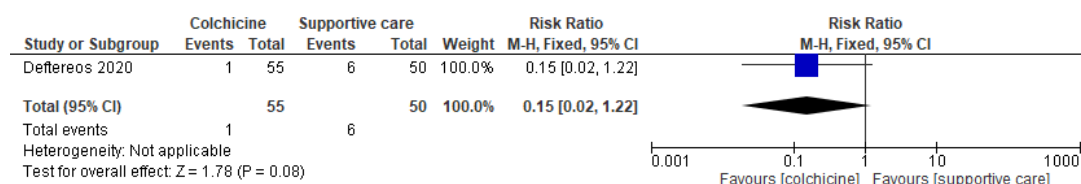

#### S3D. Length of hospital stay

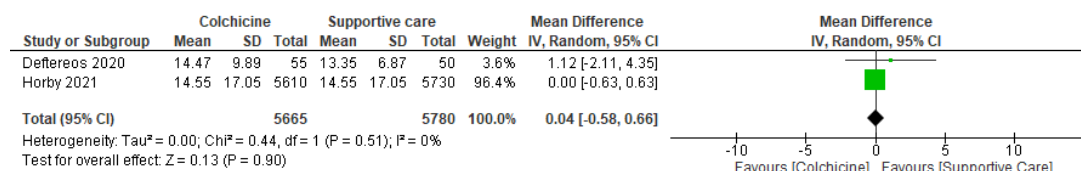

S3E. Adverse events

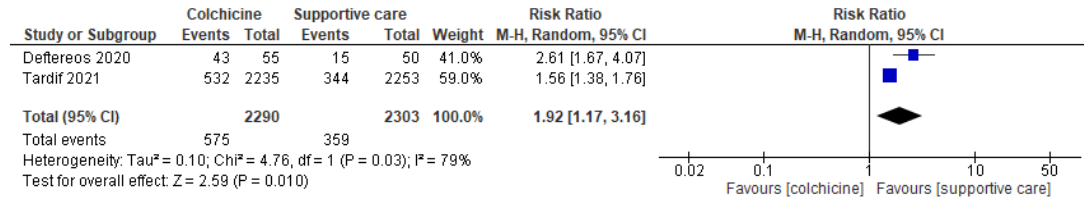

S3F. Serious adverse event

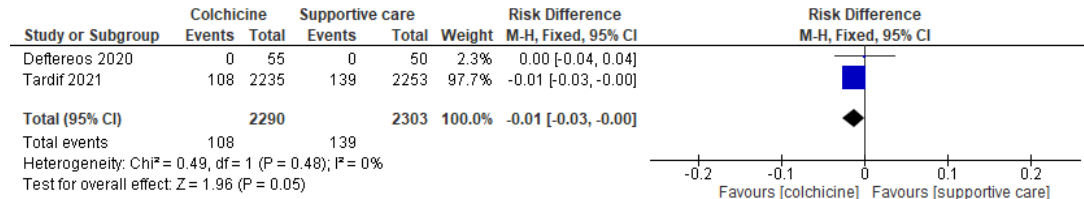

S3G. Diarrhoea adverse event

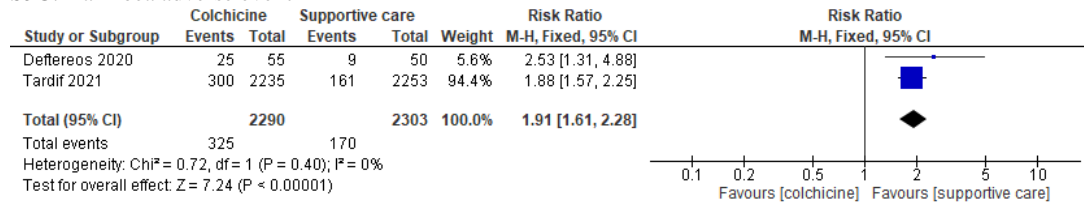

Supplement: rmdopen-2021-001746supp003_data_supplement.pdf [file rmdopen-2021-001746supp003_data_supplement.pdf]
